# Supplementary material for: A randomized, open-label study to investigate the effect of belimumab on pneumococcal vaccination in patients with active, autoantibody-positive systemic lupus erythematosus
Source: PubMed Central journal article supplement (PMC5673008; doi:10.1177/0961203317703495), 2017-05-03
Supplement: LUP703495_supplementary_material.pdf [file LUP703495_supplementary_material.pdf]

**Supplementary table: Summary of AEs (ITT population)**

| <b>AEs, n (%)</b>                                  | <b>Pre-belimumab cohort<br/>N=34</b> | <b>Belimumab-concurrent cohort<br/>N=45</b> |
|----------------------------------------------------|--------------------------------------|---------------------------------------------|
| <b>Any AE<sup>a</sup></b>                          | 31 (91.2)                            | 39 (86.7)                                   |
| Arthralgia                                         | 6 (17.6)                             | 10 (22.2)                                   |
| Nausea                                             | 6 (17.6)                             | 9 (20.0)                                    |
| Viral gastroenteritis                              | 1 (2.9)                              | 6 (13.3)                                    |
| Cough                                              | 4 (11.8)                             | 3 (6.7)                                     |
| Dizziness                                          | 4 (11.8)                             | 2 (4.4)                                     |
| Diarrhea                                           | 3 (8.8)                              | 5 (11.1)                                    |
| <b>Treatment-related AE</b>                        | 8 (23.5)                             | 4 (8.9)                                     |
| <b>Vaccine-related AE</b>                          | 0                                    | 2 (4.4)                                     |
| <b>Any SAE</b>                                     | 4 (11.8)                             | 3 (6.7)                                     |
| <b>Severe AE</b>                                   | 8 (23.5)                             | 9 (20.0)                                    |
| <b>Serious and/or severe AE</b>                    | 9 (26.5)                             | 10 (22.2)                                   |
| <b>AE resulting in study agent discontinuation</b> | 3 (8.8)                              | 0                                           |
| <b>Death</b>                                       | 0                                    | 0                                           |

<sup>a</sup>AEs reported in ≥10% of patients in either cohort are listed.

AE, adverse event; ITT, intent-to-treat; SAE, serious adverse event.
